# Supplementary material
Source: publisher figshare collection journal article supplement (https://frontiersin.figshare.com/ndownloader/files/24191918)
Supplement: Supplementary file 1 [file 24191918]

Workshop	Stakeholder	Stakeholder Group	Education	Yrs Experience	First Meeting Attended	Meeting Attended	Number Meetings Attended Until This Point	Usefullness of Science	Usefulness of LEK	Usefulness of Models	Accuracy of Science	Accuracy of LEK	Accuracy of Models	Reliability of Science	Reliability of LEK	Reliability of Models	Ease of Science	Ease of LEK	Ease of Models	Fairness of Science	Fairness of LEK	Fairness of Models	Disagreement due to�	Risk in Occupation	Risk in Recreation	Risk in Faith in Others	County of Residence
1	1	Waterman	Associates	8	1	8	0	4	5	4	2	4	2	2	4	2	1	4	2	1	5	1	Political Motives	10	5	1	Dorchester
1	2	Scientist	PhD	30	1	9	0	4	4	4	4	3	4	3	3	3	4	4	4	4	4	4	Political Motives	8	7	8	Dorchester
1	3	Environmental Group	Bachelors	30	1	8	0	4	5	4	4	5	3	5	5	4	4	4	2	4	4	4	Combination of 3	8	7	8	Talbot
1	5	Waterman	High School		1	1	0	5	1	5	2	5	2	2	5	2	1	5	1	1	5	2		8	8	4	Dorchester
1	6	Scientist	PhD	30	1	1	0	4	4	5	4	2	2	2	2	2	2	3	2	4	3	4	Multiple Interpretations of Truth	8	6	4	Calvert
1	7	Environmental Group	Masters	38	1	3	0	5	5	5	4	4	4	4	4	4	4	4	4	3	4	3	Not Enough Data	4	4	6	Anne Arundel
1	8	Scientist	PhD	25	1	6	0	5	4	5	5	4	5	4	2	4	4	4	4	3	2	3	Not Enough Data	7	7	7	Dorchester
1	9	Aquaculturist	High School	30	1	9	0	5	4	5	4	1		4	1	4	5	2	5	3	4	4	Multiple Interpretations of Truth	7	2	3	Dorchester
1	10	Aquaculturist	Bachelors	42	1	6	0	2	5	2	2	4	2	1	4	1	2	5	2	2	4	2		9	4	6	Talbot
1	11	Waterman	High School	39	1	9	0	4	5	4	4	5	4	2	4	2	1	5	2	3	4	3	Multiple Interpretations of Truth	3	5	5	Talbot
1	12	Environmental Group	Bachelors	10	1	7	0	5	5					5	4	4	4	3		5	4	4	Political Motives	5	7	8	Montgomery
1	14	Scientist	PhD	15	1	9	0	4	4	4	4	4	4	4	3	4	3		3	3	3	3	Political Motives	3	7	6	Dorchester
1	15	Scientist	PhD	9	1	9	0	5	4	5	4	4	3	3	2	3	3	2	3	5	4	5	Not Enough Data	5	5	5	Dorchester
1	16	Waterman	High School	40	1	8	0	4	5	4	4	5	2	3	3	3	3	4	3	4	5	4	Not Enough Data	3	9	5	Talbot
1	17	Environmental Group	Masters	20	1	8	0	5	5	4	4	3	4	5	4	4	3	3	3	5	4	4	Political Motives	7	7	6	Anne Arundel
1	18	Government	Bachelors	26	1	9	0							2	2	2	3	3	3				Combination of 3	3	8	7	Anne Arundel
1	20	Scientist	PhD	20	1	7	0	5	5	5	4	4	4	4		3	3			3	4	3	Not Enough Data	8	6	9	Calvert
1	21	Waterman	High School	30	1	9	0	4	5	3	4	4	3	3	4	3	4	4	4	2	4	3	Not Enough Data	1	1	5	Talbot
1	22	Waterman	High School	30	1	1	0	4	5	4	4	5	4				2	4	1								Dorchester
1	23	Government	Masters	17	1	9	0	5	4	4	4	4	4	4	2	4	4	2	3	4	2	4	Political Motives	6	6	7	Anne Arundel
1	25	Government	Bachelors	30	2	7	0																				Anne Arundel
1	28	Aquaculturist		30	3	3	0																				Talbot
1	29	Waterman	Bachelors	8	4	6	0																				Dorchester
1	30	Environmental Group	PhD	1	4	6	0																				Anne Arundel
1	31	Waterman		26	7	3	0																				Dorchester
2	1	Waterman	Associates	8	1	8	1	4	5	4	2	4	2	1	4	2	2	5	2	1	4	1	Multiple Interpretations of Truth	10	3	2	Dorchester
2	2	Scientist	PhD	30	1	9	1	5	5	4	4	3	2				4	4	4				Unknown				Dorchester
2	3	Environmental Group	Bachelors	30	1	8	1	4	5	4	2	5	2	3	3	3	2	5	4	4	4	3	Political Motives	6	6	6	Talbot
2	5	Waterman	High School		1	1	1																				Dorchester
2	6	Scientist	PhD	30	1	1	1																				Calvert
2	7	Environmental Group	Masters	38	1	3	1	5	5	5	4	4	4	4	4	4	4	4	4	3	3	3	Not Enough Data	6	7	6	Anne Arundel
2	8	Scientist	PhD	25	1	6	1	5	4	5	4	2	4	4	1	4	4	4	4	4	2	4	Not Enough Data	7	7	3	Dorchester
2	9	Aquaculturist	High School	30	1	9	1	4	4	4	5	3	4	4	2	4	5	2	4	4	2	4	Combination of Multiple Interpretations of Truth	8	2	2	Dorchester
2	10	Aquaculturist	Bachelors	42	1	6	1	4	5	2	1	5	2	1	4	1	3	4	2	1	4	1	Multiple Interpretations of Truth	10	5	5	Talbot
2	11	Waterman	High School	39	1	9	1	4	5	3	4	5	4	4	4	3	2	5	2	3	4	3	Multiple Interpretations of Truth	5	6	5	Talbot
2	12	Environmental Group	Bachelors	10	1	7	1	5	5	5	4	4		5	5	4	2	3		5	4	5	Political Motives	5	6	9	Montgomery
2	14	Scientist	PhD	15	1	9	1	5	4	5	4	4	4	4	3	4	3		3	3	3	3	Political Motives	7	5	6	Dorchester
2	15	Scientist	PhD	9	1	9	1	5	5	5		4		4	4	4	3	2	3	5	3	5	Not Enough Data	3	3	5	Dorchester
2	16	Waterman	High School	40	1	8	1	4	5	4	4	5	4	4	5	4	2	4	2	4	5	4	Political Motives	5	8	2	Talbot
2	17	Environmental Group	Masters	20	1	8	1	5	5	5	4	4	4	4	4	4	4	4	4	5	4	4	Not Enough Data	8	7	5	Anne Arundel
2	18	Government	Bachelors	26	1	9	1	4	4	4	4	4	4	4	4	4	4	4	4	4	4	4	Political Motives	5	6	8	Anne Arundel
2	20	Scientist	PhD	20	1	7	1	5	5	5	4	4		4				2		4	4		Not Enough Data	7	5	9	Calvert
2	21	Waterman	High School	30	1	9	1	4	5	4	4	4	4	4	4	4	3	4	3	4	4	4	Political Motives	8	7	2	Talbot
2	22	Waterman	High School	30	1	1	1																				Dorchester
2	23	Government	Masters	17	1	9	1	5	4	5	4	2	4	4	4	4	4	2	3	5	2	5	Political Motives	6	6	8	Anne Arundel
2	25	Government	Bachelors	30	2	7	0	5	5	3	5	4	2	1	1	1	5	5	3	5	4	3	Combination of Multiple Interpretations of Truth	6	6	6	Anne Arundel
2	28	Aquaculturist		30	3	3	0																				Talbot
2	29	Waterman	Bachelors	8	4	6	0																				Dorchester
2	30	Environmental Group	PhD	1	4	6	0																				Anne Arundel
2	31	Waterman		26	7	3	0																				Dorchester
3	1	Waterman	Associates	8	1	8	2																				Dorchester
3	2	Scientist	PhD	30	1	9	2	4	5	4	4	4	3	4	3	4	3	3	3	5	3	4	Political Motives	2	5	7	Dorchester
3	3	Environmental Group	Bachelors	30	1	8	2	4	4	4	3	4	3	4	4	3	4	4	4	4	4	3	Not Enough Data	7	6	3	Talbot
3	5	Waterman	High School		1	1	1																				Dorchester
3	6	Scientist	PhD	30	1	1	1																				Calvert
3	7	Environmental Group	Masters	38	1	3	2	5	4	4	5	4	4	5	4	4	5	5	4	3	3	3	Not Enough Data	5	7	3	Anne Arundel
3	8	Scientist	PhD	25	1	6	2	4	4	4	4	4	4	4	2	4	4	4	4	4	4	4	Not Enough Data	5	8	5	Dorchester
3	9	Aquaculturist	High School	30	1	9	2	5	3	5	4	3	4	4	2	4	5	2	5	5	3	5	Not Enough Data	8	5	5	Dorchester
3	10	Aquaculturist	Bachelors	42	1	6	2	4	5	2	2	4	2	2	4	2	3	4	2	2	4	2	Multiple Interpretations of Truth	1	6	1	Talbot
3	11	Waterman	High School	39	1	9	2							3	4	3				3	4	3	Multiple Interpretations of Truth	6	6	3	Talbot
3	12	Environmental Group	Bachelors	10	1	7	2	5	5	4	4	3	3	4	4	3	4	4	3	5	5	5	Multiple Interpretations of Truth	5	6	7	Montgomery
3	14	Scientist	PhD	15	1	9	2	5	5	5	4	4	4		3	3	4	3	3	4	3	4	Multiple Interpretations of Truth	6	4	7	Dorchester
3	15	Scientist	PhD	9	1	9	2	5	4	5	4	2	4	4	3	4	3	2	3	4	3	4	Not Enough Data	3	3	4	Dorchester
3	16	Waterman	High School	40	1	8	2	4	5	4	4	5	4	4	4	3	3	4	3	4	5	4	Political Motives	5	5	7	Talbot
3	17	Environmental Group	Masters	20	1	8	2	4	4	4	4	4	3	4	3	3	4	4	4	5	3	3	Not Enough Data	7	7	5	Anne Arundel
3	18	Government	Bachelors	26	1	9	2	5	5	3	5	4	4	4	4	3	4	4	3	5	4	3		4	8	8	Anne Arundel
3	20	Scientist	PhD	20	1	7	2	5	5	5	4	4	4	2	3	2	3	3	4	4	4	4	Not Enough Data	8	5	6	Calvert
3	22	Waterman	High School	30	1	9	1																				Talbot
3	21	Waterman	High School	30	1	1	2	4	5	4	4	4	4	4	5	3	2	4	1	4	4	4	Multiple Interpretations of Truth	8	4	5	Dorchester
3	23	Government	Masters	17	1	9	2	5	4	5	4	4	4	4	3	4	4	4	4	4	2	4	Multiple Interpretations of Truth	7	7	8	Anne Arundel
3	25	Government	Bachelors	30	2	7	0	5	5	4	5	4	3	3	3	2	5	4	3	5	4	3	Multiple Interpretations of Truth	7	7	7	Anne Arundel
3	28	Aquaculturist		30	3	3	0	4	5	4	2	5	2	4	3	3	2	4	3	4	4	4	Not Enough Data	8	5	2	Talbot
3	29	Waterman	Bachelors	8	4	6	0																				Dorchester
3	30	Environmental Group	PhD	1	4	6	0																				Anne Arundel
3	31	Waterman		26	7	3	0																				Dorchester
4	1	Waterman	Associates	8	1	8	2	4	5	4	3	5	3	3	4	3	2	4	2	3	4	3	Not Enough Data	8	4	2	Dorchester
4	2	Scientist	PhD	30	1	9	3	5	5	5	4	4	4	3	2	2	3	4	3	4	4	4	Multiple Interpretations of Truth	8	8	9	Dorchester
4	3	Environmental Group	Bachelors	30	1	8	3	4	5	4	4	5	4	4	4	4	4	4	4	4	4	4	Multiple Interpretations of Truth	8	7	5	Talbot
4	5	Waterman	High School		1	1	1																				Dorchester
4	6	Scientist	PhD	30	1	1	1																				Calvert
4	7	Environmental Group	Masters	38	1	3	3																				Anne Arundel
4	8	Scientist	PhD	25	1	6	3							4	3	4				4	4	4	Not Enough Data	5	9	5	Dorchester
4	9	Aquaculturist	High School	30	1	9	3	5	3	4	4	2		4	1		5	2	4	4	1		Political Motives	9	3	6	Dorchester
4	10	Aquaculturist	Bachelors	42	1	6	3																				Talbot
4	11	Waterman	High School	39	1	9	2	4	4	3	3	4	3	3	4	3	4	4	3	2	4	2	Political Motives	6	6	7	Talbot
4	12	Environmental Group	Bachelors	10	1	7	3	5	5	4	5	4	4	4	4	4	4	4	4	5	4	5	Multiple Interpretations of Truth	7	7	9	Montgomery
4	14	Scientist	PhD	15	1	9	3	5	4	5	4	4	4	4	3	4	3	3	3	4	3	4	Not Enough Data	6	4	7	Dorchester
4	15	Scientist	PhD	9	1	9	3	5	4	5	4	4	4	4	4	4	3	2	3	4	4	4	Not Enough Data	5	4	3	Dorchester
4	16	Waterman	High School	40	1	8	3	3	4	4	4	4	4	4	4	4	2	4	3	4	4	4	Political Motives	4	3	5	Talbot
4	17	Environmental Group	Masters	20	1	8	3	5	4	4	3	4	4	4	4	4	4	4	4	5	3	4	Not Enough Data	7	8	6	Anne Arundel
4	18	Government	Bachelors	26	1	9	3	4	4	3	4	4	3	3	3		4	4	3	4	4	3	Multiple Interpretations of Truth	5	8	7	Anne Arundel
4	20	Scientist	PhD	20	1	7	3	4	4	5	4	4	4	4	4	4	3	4	3	3	4	3	Multiple Interpretations of Truth	8	5	8	Calvert
4	21	Waterman	High School	30	1	9	3	4	4	4	4	4	3	4	4	3	4	5	4	3	4	3	Multiple Interpretations of Truth	1	2	1	Talbot
4	22	Waterman	High School	30	1	1	1																				Dorchester
4	23	Government	Masters	17	1	9	3	5	5	5	4	3	4	4	2	4	4	3	3	4	4	4	Multiple Interpretations of Truth	6	8	7	Anne Arundel
4	25	Government	Bachelors	30	2	7	1	5	5	3	5	4	4	3	3	3	5	4	3	4	4	3	Not Enough Data	6	6	7	Anne Arundel
4	28	Aquaculturist		30	3	3	1	4	5	3	3	3	3	3	3	3	2	2	3	4	4	3		10	6	6	Talbot
4	29	Waterman	Bachelors	8	4	6	0	4	5	3	4	5	4	4	4	4	4	4	1	4	4	2	Political Motives	3	8	8	Dorchester
4	30	Environmental Group	PhD	1	4	6	0	5	4	5				4	4	4	4	3	4	5	4	5	Not Enough Data	8	8	6	Anne Arundel
4	31	Waterman		26	7	3	0																				Dorchester
5	1	Waterman	Associates	8	1	8	3	2	4	2	3	4	3	2	4	2	2	4	2	2	4	2	Not Enough Data	8	4	2	Dorchester
5	2	Scientist	PhD	30	1	9	4	5	5	5	4	3	3	3	3	3	3	4	3	4	3	4	Not Enough Data	7	7	8	Dorchester
5	3	Environmental Group	Bachelors	30	1	8	4	4	5	4	3	4	3	4	4	4	4	5	4	4	4	4	Political Motives	8	8	5	Talbot
5	5	Waterman	High School		1	1	1																				Dorchester
5	6	Scientist	PhD	30	1	1	1																				Calvert
5	7	Environmental Group	Masters	38	1	3	3																				Anne Arundel
5	8	Scientist	PhD	25	1	6	4	4	4	4	4	4	4	4	4	4	4	4	4	4	4	4	Not Enough Data	5	8	5	Dorchester
5	9	Aquaculturist	High School	30	1	9	4							4	4					4	4		Not Enough Data	7	4	3	Dorchester
5	10	Aquaculturist	Bachelors	42	1	6	3																				Talbot
5	11	Waterman	High School	39	1	9	3	4	4	3	4	4	3	4	4	3	3	4	3	4	4	3	Not Enough Data	5	5	5	Talbot
5	12	Environmental Group	Bachelors	10	1	7	4	5	4	4	5	4	4	5	4	4	4	2	4	5	4	5	Not Enough Data	7	7	9	Montgomery
5	14	Scientist	PhD	15	1	9	4	4	4	4	4	4	4	4	3	4	3	3	3	4	3	4	Multiple Interpretations of Truth	4	5	7	Dorchester
5	15	Scientist	PhD	9	1	9	4	5	5	5	4	4	4	4	3	4	3	2	3	4	4	4	Not Enough Data	4	4	3	Dorchester
5	16	Waterman	High School	40	1	8	4	4	5	4	4	5	4	4	5	4	2	4	3	3	4	3	Political Motives	5	5	5	Talbot
5	17	Environmental Group	Masters	20	1	8	4																				Anne Arundel
5	18	Government	Bachelors	26	1	9	4	5	5	4	5	5	4	4	4	3	4	4	4	4	4	4	Political Motives	5	8	7	Anne Arundel
5	20	Scientist	PhD	20	1	7	4																				Calvert
5	21	Waterman	High School	30	1	9	4	4	4	4	4	4	4	4	4	4	4	4	4	4	4	4	Multiple Interpretations of Truth	2	2	2	Talbot
5	22	Waterman	High School	30	1	1	1																				Dorchester
5	23	Government	Masters	17	1	9	4	5	4	5	4	4	4	4	4	4	3	2	3	4	2	4	Multiple Interpretations of Truth	7	7	8	Anne Arundel
5	25	Government	Bachelors	30	2	7	2	5	4	3	5	4	3	4	4	4	4	4	3	4	4	3	Not Enough Data	6	6	6	Anne Arundel
5	28	Aquaculturist		30	3	3	2																				Talbot
5	29	Waterman	Bachelors	8	4	6	1	4	4		4	5		4	4		2	4		4	5		Political Motives	4	5	9	Dorchester
5	30	Environmental Group	PhD	1	4	6	1	5	4	5	4		4	4		4	5	4	5	5		4	Not Enough Data	7	5	5	Anne Arundel
5	31	Waterman		26	7	3	0																				Dorchester
6	1	Waterman	Associates	8	1	8	4	3	4	3	2	4	2	2	4	2	2	4	2	2	4	2	Not Enough Data	8	3	1	Dorchester
6	2	Scientist	PhD	30	1	9	5	5	4	4	4	4	4				4	4	4								Dorchester
6	3	Environmental Group	Bachelors	30	1	8	5	4	4	4	4	5	2	3	5	2	4	4	4	2	4	2	Political Motives	9	8	5	Talbot
6	5	Waterman	High School		1	1	1																				Dorchester
6	6	Scientist	PhD	30	1	1	1																				Calvert
6	7	Environmental Group	Masters	38	1	3	3																				Anne Arundel
6	8	Scientist	PhD	25	1	6	5	4	4	4	4	4	4	4	2	4	4	2	4	4	4	4	Not Enough Data	6	9	5	Dorchester
6	9	Aquaculturist	High School	30	1	9	4	4	2	3	4	2	3	4	2	3	4	2	3	4	4	3	Not Enough Data	8	4	5	Dorchester
6	10	Aquaculturist	Bachelors	42	1	6	3																				Talbot
6	11	Waterman	High School	39	1	9	4	4	4	3	4	4	4	4	4	3	4	4	3	4	4	3	Political Motives	5	4	5	Talbot
6	12	Environmental Group	Bachelors	10	1	7	5																				Montgomery
6	14	Scientist	PhD	15	1	9	5	5	4	4	4	4	4	4	4	4	4	4	3	4	3	4	Multiple Interpretations of Truth	7	5	8	Dorchester
6	15	Scientist	PhD	9	1	9	5	5	4	5	4	4	4	4	4	4	3	2	3	5	4	5	Not Enough Data	4	3	3	Dorchester
6	16	Waterman	High School	40	1	8	5	4	4	3	4	4	3	3	4	3	2	4	3	3	4	3	Political Motives	5	3	5	Talbot
6	17	Environmental Group	Masters	20	1	8	4	5	4	5	4	3	4	4	3	4	4	3	4	5	4	4	Not Enough Data	8	8	6	Anne Arundel
6	18	Government	Bachelors	26	1	9	5	4	4	4	4	4	4	4	4	4	4	4	4	4	4	4	Not Enough Data	5	8	7	Anne Arundel
6	20	Scientist	PhD	20	1	7	4	4	5	5	4	4	4	2	2	2	4			4	4	4	Multiple Interpretations of Truth	7	5	7	Calvert
6	21	Waterman	High School	30	1	9	5	2	2	2	4	4	4	4	4	4	4	4	4	4	4	4	Not Enough Data	2	2	2	Talbot
6	22	Waterman	High School	30	1	1	1																				Dorchester
6	23	Government	Masters	17	1	9	5	5	4	4	5	4	4	4	2	4	4	4	4	4	4	4	Multiple Interpretations of Truth	6	7	8	Anne Arundel
6	25	Government	Bachelors	30	2	7	3	5	4	4	5	5	4	4	3	3	4	4	3	3	3	3	Multiple Interpretations of Truth	4	4	8	Anne Arundel
6	28	Aquaculturist		30	3	3	3	4	4	3	3	2	3	4	4	3	2	2	3	4	4	3	Not Enough Data	9	6	5	Talbot
6	29	Waterman	Bachelors	8	4	6	2	4	5	2	4	4	3	4	4	3	1	3	2	4	4	3	Political Motives	7	4	9	Dorchester
6	30	Environmental Group	PhD	1	4	6	2	5	4	5	5	4	4	5	4	4	5	4	5	5	4	5	Not Enough Data	7	8	5	Anne Arundel
6	31	Waterman		26	7	3	0																				Dorchester
7	1	Waterman	Associates	8	1	8	5	3	4	3	3	4	3	3	4	3	2	4	2	3	4	3	Not Enough Data	8	4	2	Dorchester
7	2	Scientist	PhD	30	1	9	6	4	4	4	4	3	3	3	3	3	4	4	4	5	4	4	Not Enough Data	8	6	9	Dorchester
7	3	Environmental Group	Bachelors	30	1	8	6																				Talbot
7	5	Waterman	High School		1	1	1																				Dorchester
7	6	Scientist	PhD	30	1	1	1																				Calvert
7	7	Environmental Group	Masters	38	1	3	3																				Anne Arundel
7	8	Scientist	PhD	25	1	6	6	4	4	4	4	4	4	4	4	4	4	4	4	4	4	4	Not Enough Data	6	9	5	Dorchester
7	9	Aquaculturist	High School	30	1	9	5	5	4		4	2		4	3		5	2		4	3	3	Not Enough Data	8	4	6	Dorchester
7	10	Aquaculturist	Bachelors	42	1	6	3	3	5	2	4	5	3	4	4	4	3	5	2	3	4	3	Political Motives	1	6	5	Talbot
7	11	Waterman	High School	39	1	9	5	4	4	4	4	4	4	3	4	3	3	4	4	3	4	3	Political Motives	6	5	6	Talbot
7	12	Environmental Group	Bachelors	10	1	7	5																				Montgomery
7	14	Scientist	PhD	15	1	9	6	4	4	4	4	4	4	4	4	4	4	4	4	4	4	4	Not Enough Data	7	6	8	Dorchester
7	15	Scientist	PhD	9	1	9	6	4	4	4	4	4	4	4	3	4	3	2	3	4	4	4	Not Enough Data	4	3	3	Dorchester
7	16	Waterman	High School	40	1	8	6																				Talbot
7	17	Environmental Group	Masters	20	1	8	5	5	4	4	4	3	4	5	4	4	4	3	3	5	4	4		8	7	7	Anne Arundel
7	18	Government	Bachelors	26	1	9	6	4	4	4	4	4	4	4	4	4	4	4	4	4	4	4	Multiple Interpretations of Truth	5	8	7	Anne Arundel
7	20	Scientist	PhD	20	1	7	5	5	5	5	4	4	4	3	3	3	4	4	4	3	3	3	Not Enough Data	8	4	8	Calvert
7	21	Waterman	High School	30	1	9	6	4	4	4	3	3	3	4	4	4	2	2	3	4	4	4		4	2	4	Talbot
7	22	Waterman	High School	30	1	1	1																				Dorchester
7	23	Government	Masters	17	1	9	6	5	4	5	4	4	4	4	4	4	4	2	4	5	4	5	Multiple Interpretations of Truth	7	7	7	Anne Arundel
7	25	Government	Bachelors	30	2	7	4	5	5	4	5	4	4	4	3	3	5	5	4	4	4	3	Multiple Interpretations of Truth	6	8	8	Anne Arundel
7	28	Aquaculturist		30	3	3	4																				Talbot
7	29	Waterman	Bachelors	8	4	6	3	4	5	4	4	5	4	3	4	3	2	4	2	4	5	4	Political Motives	6	5	8	Dorchester
7	30	Environmental Group	PhD	1	4	6	3	5	4	4	5	4	4	4	4	4	5	4	5	5	4	5	Not Enough Data	8	8	6	Anne Arundel
7	31	Waterman		26	7	3	0	4	4	2	2	4	2	4	4	2		4	2	4	4	2	Not Enough Data	3	5	3	Dorchester
8	1	Waterman	Associates	8	1	8	6	3	4	3	3	4	3	3	4	3	2	4	2	3	4	3	Not Enough Data	8	5	2	Dorchester
8	2	Scientist	PhD	30	1	9	7	4	4	4	4	3	3	4	3	3	4	4	4	4	4	4	Not Enough Data	8	5	9	Dorchester
8	3	Environmental Group	Bachelors	30	1	8	6	4	4	3	4	4	3	4	4	3	4	4	2	4	4	3	Multiple Interpretations of Truth	4	5	7	Talbot
8	5	Waterman	High School		1	1	1																				Dorchester
8	6	Scientist	PhD	30	1	1	1																				Calvert
8	7	Environmental Group	Masters	38	1	3	3																				Anne Arundel
8	8	Scientist	PhD	25	1	6	7																				Dorchester
8	9	Aquaculturist	High School	30	1	9	6	4	2		4	2		4	2		4	2		4	2		Not Enough Data	7	4	4	Dorchester
8	10	Aquaculturist	Bachelors	42	1	6	4	4	4	4	4	4	4	2	2	2	4	4	4	4	4	4	Not Enough Data	5	5	5	Talbot
8	11	Waterman	High School	39	1	9	6	4	4	3	3	4	3	3	4	3	3	4	3	4	4	3	Political Motives	5	5	6	Talbot
8	12	Environmental Group	Bachelors	10	1	7	5	5	4	4	4	4	4	5	4	5	4	4	4	4	3	4	Not Enough Data	6	7	7	Montgomery
8	14	Scientist	PhD	15	1	9	7	4	4	4	4	4	4	4	4	4	4	4	4	4	4	4		6	5	7	Dorchester
8	15	Scientist	PhD	9	1	9	7	4	4	4	4	3	4	4	4	4	3	2	3	3	4	3	Not Enough Data	4	3	3	Dorchester
8	16	Waterman	High School	40	1	8	6	4	4	4	4	4	4	3	4	3	3	4	3	4	4	4	Not Enough Data	4	4	6	Talbot
8	17	Environmental Group	Masters	20	1	8	6	5	3	4	4	3	3	5	3	4	4	4	4	5	3	4	Not Enough Data	7	7	6	Anne Arundel
8	18	Government	Bachelors	26	1	9	7	4	4	4	4	4	4				4	4	4	4	4	4	Multiple Interpretations of Truth	5	9	8	Anne Arundel
8	20	Scientist	PhD	20	1	7	6																				Calvert
8	21	Waterman	High School	30	1	9	7	4	4	4	4	4	4	4	4	4	4	4	4	4	4	4	Not Enough Data	4	4	4	Talbot
8	22	Waterman	High School	30	1	1	1																				Dorchester
8	23	Government	Masters	17	1	9	7	5	5	5	4	3	4	4	2	4	4	4	4	4	4	4	Multiple Interpretations of Truth	6	6	8	Anne Arundel
8	25	Government	Bachelors	30	2	7	5	5	5	4	5	5	3	3	3	3	4	4	3	4	4	3	Multiple Interpretations of Truth	7	7	7	Anne Arundel
8	28	Aquaculturist		30	3	3	4																				Talbot
8	29	Waterman	Bachelors	8	4	6	4	4	5	4	4	5	4	4	5	4	2	4	3	4	5	3	Political Motives	7	5	9	Dorchester
8	30	Environmental Group	PhD	1	4	6	4	5	4	4	5	4	4	4	4	4	5	4	4	5	4	4	Not Enough Data	8	7	5	Anne Arundel
8	31	Waterman		26	7	3	1	4	4	4	2	4	3	2	4	2	2	4	3	2	4	2	Multiple Interpretations of Truth	2	5	2	Dorchester
9	1	Waterman	Associates	8	1	8	7	3	4	3	3	4	3	2	4	2	2	4	2	2	4	2	Not Enough Data	8	5	3	Dorchester
9	2	Scientist	PhD	30	1	9	8	4	4	4	4	3	3	3	3	3	4	4	4	5	4	4	Not Enough Data	7	6	7	Dorchester
9	3	Environmental Group	Bachelors	30	1	8	7	3	5	3	2	5	2	4	5	4	4	5	4	4	4	4	Multiple Interpretations of Truth	8	8	8	Talbot
9	5	Waterman	High School		1	1	1																				Dorchester
9	6	Scientist	PhD	30	1	1	1																				Calvert
9	7	Environmental Group	Masters	38	1	3	3																				Anne Arundel
9	8	Scientist	PhD	25	1	6	7																				Dorchester
9	9	Aquaculturist	High School	30	1	9	7	4	4	4	4	4	4	3	3	3	4	4	4	4	3	4	Not Enough Data	8	5	4	Dorchester
9	10	Aquaculturist	Bachelors	42	1	6	5	4	4	4	4	4	4	4	4	4	4	4	4	4	4	4	Political Motives	1	5	5	Talbot
9	11	Waterman	High School	39	1	9	7	3	4	2	3	4	2	3	4	2	3	4	3	3	4	3	Political Motives	5	5	6	Talbot
9	12	Environmental Group	Bachelors	10	1	7	6	5	4	4	5	4	4	4	3	4	4	3	4	5	4	4	Multiple Interpretations of Truth	7	8	8	Montgomery
9	14	Scientist	PhD	15	1	9	8	4	4	4	4	4	4	4	4	4	4	4	4	4	4	4	Multiple Interpretations of Truth	4	3	6	Dorchester
9	15	Scientist	PhD	9	1	9	8	4	4	4	4	4	4	4	4	4	3	2	3	3	3	3		3	3	3	Dorchester
9	16	Waterman	High School	40	1	8	7	4	5	3	4	5	3	3	5	3	3	5	3	3	5	3	Political Motives	4	5	5	Talbot
9	17	Environmental Group	Masters	20	1	8	7	5	4	4	4	3	4	5	4	4	5	3	4	5	4	4	Not Enough Data	7	8	7	Anne Arundel
9	18	Government	Bachelors	26	1	9	8	5	5	5	4	4	4	4	4	4	4	4	4	4	4	4	Political Motives	4	8	7	Anne Arundel
9	20	Scientist	PhD	20	1	7	6	5	4	4		4		4	4	4	4	4	4	3	4	3	Not Enough Data	7	4	7	Calvert
9	21	Waterman	High School	30	1	9	8	4	4	4	4	4	4	4	4	4	4	4	4	4	4	4	Not Enough Data	5	5	5	Talbot
9	22	Waterman	High School	30	1	1	1																				Dorchester
9	23	Government	Masters	17	1	9	4	5	5	5	4	4	4	4	4	4	4	2	4	4	4	4	Multiple Interpretations of Truth	7	6	8	Anne Arundel
9	25	Government	Bachelors	30	2	7	6	5	5	4	5	5	4	5	4	4	5	5	4	4	4	3	Multiple Interpretations of Truth	8	7	8	Anne Arundel
9	28	Aquaculturist		30	3	3	4																				Talbot
9	29	Waterman	Bachelors	8	4	6	5	4	5	2	4	5	3	4	5	2	2	5	3	4	4	3	Political Motives	3	3	8	Dorchester
9	30	Environmental Group	PhD	1	4	6	5	5	4	4	4	4	4	5	4	4	5	4	4	5	4	5	Not Enough Data	8	6	6	Anne Arundel
9	31	Waterman		26	7	3	2	4	5	4	4	4	4	4	4	4	4	4	4	3	4	4	Not Enough Data	2	3	2	Dorchester
